# Supplementary material for: Safety and Immunogenicity of a Full-dose, Split-virion, Inactivated, Quadrivalent Influenza Vaccine in Healthy Children 6-35 Months of Age: A Randomized Controlled Clinical Trial
Source: PubMed Central journal article supplement — Pediatr Infect Dis J. 2018 Nov 2;38(3):323–8. doi: 10.1097/INF.0000000000002227 (PMC6437098; doi:10.1097/inf.0000000000002227), 2018-11-02
Supplement: inf-38-323-s001.pdf [file inf-38-323-s001.pdf]

**Table S1. Additional exclusions**

| <b>Exclusion</b>                                                                                                                                                | <b>Time period</b>                                                |
|-----------------------------------------------------------------------------------------------------------------------------------------------------------------|-------------------------------------------------------------------|
| Received any vaccine                                                                                                                                            | 30 days prior to enrolment                                        |
| Planned to receive a vaccine                                                                                                                                    | During the study between enrolment and the last study vaccination |
| Received immune globulins, blood, or blood-derived products                                                                                                     | 3 months prior to enrolment                                       |
| Known or suspected congenital or acquired immunodeficiency                                                                                                      | Any time                                                          |
| Received immunosuppressive therapy                                                                                                                              | 6 months prior to enrolment                                       |
| Received long-term systemic corticosteroid therapy (prednisone or equivalent for more than 2 consecutive weeks)                                                 | 3 months prior to enrolment                                       |
| Systemic hypersensitivity to any of the vaccine components or life-threatening reaction to the trial vaccine or a vaccine containing any of the same substances | Any time                                                          |
| Guillain-Barré syndrome                                                                                                                                         | Any time                                                          |
| Thrombocytopenia, which may be a contraindication for intramuscular vaccination, at the discretion of the investigator                                          | Any time                                                          |
| Bleeding disorder, or receipt of anticoagulants contraindicating intramuscular vaccination                                                                      | 3 weeks prior to enrolment                                        |
| Deprived of freedom by an administrative or court order, or in an emergency setting, or hospitalized                                                            | At inclusion                                                      |

---

involuntarily

Serious adverse reactions to any influenza vaccine

Any time

Any other illness or disorder that might, in the investigator's opinion, affect the outcome of the study

At inclusion

Known seropositivity for human immunodeficiency virus, hepatitis B, or hepatitis C

Any time

Identified as a natural or adopted child of either the Investigator or an employee with direct involvement in  
the proposed study.

Any time

---
