# Supplementary material for: Safety and Immunogenicity of a Full-dose, Split-virion, Inactivated, Quadrivalent Influenza Vaccine in Healthy Children 6-35 Months of Age: A Randomized Controlled Clinical Trial
Source: PubMed Central journal article supplement — Pediatr Infect Dis J. 2018 Nov 2;38(3):323–8. doi: 10.1097/INF.0000000000002227 (PMC6437098; doi:10.1097/inf.0000000000002227), 2018-11-02
Supplement: inf-38-323-s002.pdf [file inf-38-323-s002.pdf]

**Table S2. Solicited reactions and associated intensity scales**

| <b>Reaction</b>                                     | <b>Intensity Scale</b>                                                                                                                                                                                             |
|-----------------------------------------------------|--------------------------------------------------------------------------------------------------------------------------------------------------------------------------------------------------------------------|
| Local                                               |                                                                                                                                                                                                                    |
| Injection-site tenderness                           | Grade 1: Minor reaction when injection site is touched<br>Grade 2: Cries or protests when injection site is touched<br>Grade 3: Cries when injected limb is moved, or the movement of the injected limb is reduced |
| Injection-site erythema and injection-site swelling | Grade 1: > 0 to < 25 mm<br>Grade 2: $\geq$ 25 to < 50 mm<br>Grade 3: $\geq$ 50 mm                                                                                                                                  |
| Systemic                                            |                                                                                                                                                                                                                    |
| Fever                                               | Grade 1: $\geq$ 100.4°F to $\leq$ 101.3°F<br>Grade 2: > 101.3°F to $\leq$ 103.1°F<br>Grade 3: > 103.1°F                                                                                                            |
| Vomiting                                            | Grade 1: 1 episode per 24 hours<br>Grade 2: 2–5 episodes per 24 hours<br>Grade 3: $\geq$ 6 episodes per 24 hours or requiring parenteral hydration                                                                 |

---

Abnormal crying

Grade 1: < 1 hour

Grade 2: 1–3 hours

Grade 3: > 3 hours

Drowsiness

Grade 1: Sleepier than usual or less interested in surroundings

Grade 2: Not interested in surroundings or did not wake up for a feed/meal

Grade 3: Sleeping most of the time or difficult to wake up

Loss of appetite

Grade 1: Eating less than normal

Grade 2: Missed 1 or 2 feeds/meals completely

Grade 3: Refuses  $\geq 3$  feeds/meals or refuses most feeds/meals

Irritability

Grade 1: Easily consolable

Grade 2: Requiring increased attention

Grade 3: Inconsolable

---
