# Supplementary material for: Safety and Immunogenicity of a Full-dose, Split-virion, Inactivated, Quadrivalent Influenza Vaccine in Healthy Children 6-35 Months of Age: A Randomized Controlled Clinical Trial
Source: PubMed Central journal article supplement — Pediatr Infect Dis J. 2018 Nov 2;38(3):323–8. doi: 10.1097/INF.0000000000002227 (PMC6437098; doi:10.1097/inf.0000000000002227), 2018-11-02
Supplement: inf-38-323-s003.pdf [file inf-38-323-s003.pdf]

**Table S3. Post-vaccination immunogenicity for participants aged 6–23 months**

| Measure                                   | Strain     | Half dose of IIV4 |                  | Full dose of IIV4 |                  | Comparison (95% CI)           |
|-------------------------------------------|------------|-------------------|------------------|-------------------|------------------|-------------------------------|
|                                           |            | N                 | Value (95% CI)   | N                 | Value (95% CI)   |                               |
| HAI GMT                                   | A(H1N1)    | 274               | 119 (95.5–148)   | 293               | 212 (173–259)    | 1.78 (1.32–2.39) <sup>a</sup> |
|                                           | A(H3N2)    | 277               | 130 (109–156)    | 296               | 201 (170–237)    | 1.54 (1.21–1.97) <sup>a</sup> |
|                                           | B/Victoria | 274               | 157 (128–191)    | 293               | 217 (179–263)    | 1.38 (1.05–1.83) <sup>a</sup> |
|                                           | B/Yamagata | 277               | 146 (122–175)    | 296               | 229 (193–273)    | 1.57 (1.22–2.01) <sup>a</sup> |
| Seroconversion<br>rate (%)                | A(H1N1)    | 245               | 73.9 (67.9–79.3) | 252               | 81.3 (76.0–86.0) | 7.5 (0.139–14.7) <sup>b</sup> |
|                                           | A(H3N2)    | 248               | 81.0 (75.6–85.7) | 255               | 89.4 (85.0–92.9) | 8.4 (2.16–14.6) <sup>b</sup>  |
|                                           | B/Victoria | 245               | 82.4 (77.1–87.0) | 252               | 82.5 (77.3–87.0) | 0.1 (–6.60–6.81) <sup>b</sup> |
|                                           | B/Yamagata | 248               | 83.5 (78.2–87.9) | 254               | 87.0 (82.2–90.9) | 3.5 (–2.69–9.80) <sup>b</sup> |
| Post- to pre-<br>vaccination GMT<br>ratio | A(H1N1)    | 245               | 7.44 (6.22–8.91) | 252               | 13.1 (10.7–16.0) | -                             |
|                                           | A(H3N2)    | 248               | 11.9 (9.91–14.4) | 255               | 18.4 (15.3–22.0) | -                             |

| Measure | Strain     | Half dose of IIV4 |                  | Full dose of IIV4 |                  | Comparison (95% CI) |
|---------|------------|-------------------|------------------|-------------------|------------------|---------------------|
|         |            | N                 | Value (95% CI)   | N                 | Value (95% CI)   |                     |
|         | B/Victoria | 245               | 11.6 (9.66–13.8) | 252               | 15.2 (12.5–18.4) | -                   |
|         | B/Yamagata | 248               | 11.4 (9.62–13.5) | 254               | 16.6 (13.8–19.9) | -                   |

Immunogenicity was assessed according to the vaccine received in all participants in the immunogenicity subset who received at least one dose of the study vaccine, had a valid post-vaccination serology result for at least one strain, and completed the study according to protocol. Abbreviations: CI, confidence interval; GMT, geometric mean titer; HAI, hemagglutination inhibition; IIV4, quadrivalent split-virion inactivated influenza vaccine; -, not calculated/determined.

<sup>a</sup> Ratio of HAI GMTs (full dose/half dose).

<sup>b</sup> Difference in seroconversion rate: seroconversion rate for the full dose of IIV4 minus the seroconversion rate for the half dose of IIV4.
