# Supplementary material for: Safety and Immunogenicity of a Full-dose, Split-virion, Inactivated, Quadrivalent Influenza Vaccine in Healthy Children 6-35 Months of Age: A Randomized Controlled Clinical Trial
Source: PubMed Central journal article supplement — Pediatr Infect Dis J. 2018 Nov 2;38(3):323–8. doi: 10.1097/INF.0000000000002227 (PMC6437098; doi:10.1097/inf.0000000000002227), 2018-11-02
Supplement: inf-38-323-s004.pdf [file inf-38-323-s004.pdf]

**Table S4. Post-vaccination immunogenicity for participants aged 24–35 months**

| Measure                                   | Strain     | Half dose of IIV4 |                  | Full dose of IIV4 |                  | Comparison (95% CI)            |
|-------------------------------------------|------------|-------------------|------------------|-------------------|------------------|--------------------------------|
|                                           |            | N                 | Value (95% CI)   | N                 | Value (95% CI)   |                                |
| HAI GMT                                   | A(H1N1)    | 246               | 410 (351–478)    | 246               | 488 (418–569)    | 1.19 (0.957–1.48) <sup>a</sup> |
|                                           | A(H3N2)    | 248               | 400 (322–498)    | 246               | 608 (500–741)    | 1.52 (1.13–2.04) <sup>a</sup>  |
|                                           | B/Victoria | 246               | 460 (388–544)    | 246               | 611 (521–716)    | 1.33 (1.05–1.67) <sup>a</sup>  |
|                                           | B/Yamagata | 247               | 428 (363–505)    | 247               | 577 (487–683)    | 1.35 (1.06–1.70) <sup>a</sup>  |
| Seroconversion<br>rate (%)                | A(H1N1)    | 225               | 84.4 (79.0–88.9) | 231               | 87.0 (82.0–91.1) | 2.6 (–3.89–9.06) <sup>b</sup>  |
|                                           | A(H3N2)    | 227               | 82.8 (77.3–87.5) | 232               | 82.8 (77.3–87.4) | –0.1 (–6.98–6.89) <sup>b</sup> |
|                                           | B/Victoria | 225               | 92.4 (88.2–95.5) | 231               | 95.2 (91.6–97.6) | 2.8 (–1.73–7.49) <sup>b</sup>  |
|                                           | B/Yamagata | 226               | 92.5 (88.2–95.6) | 234               | 95.7 (92.3–97.9) | 3.2 (–1.15–7.87) <sup>b</sup>  |
| Post- to pre-<br>vaccination GMT<br>ratio | A(H1N1)    | 225               | 11.1 (9.47–12.9) | 231               | 15.5 (13.2–18.2) | -                              |
|                                           | A(H3N2)    | 227               | 11.6 (9.65–14.0) | 232               | 14.5 (12.0–17.5) | -                              |

| Measure | Strain     | Half dose of IIV4 |                  | Full dose of IIV4 |                  | Comparison (95% CI) |
|---------|------------|-------------------|------------------|-------------------|------------------|---------------------|
|         |            | N                 | Value (95% CI)   | N                 | Value (95% CI)   |                     |
|         | B/Victoria | 225               | 13.3 (11.5–15.3) | 231               | 19.7 (17.2–22.7) | -                   |
|         | B/Yamagata | 226               | 14.2 (12.4–16.4) | 234               | 22.3 (19.3–25.6) | -                   |

Immunogenicity was assessed according to the vaccine received in all participants in the immunogenicity subset who received at least one dose of the study vaccine, had a valid post-vaccination serology result for at least one strain, and completed the study according to protocol. Abbreviations: CI, confidence interval; GMT, geometric mean titer; HAI, hemagglutination inhibition; IIV4, quadrivalent split-virion inactivated influenza vaccine; -, not calculated/determined.

<sup>a</sup> Ratio of HAI GMTs (full dose/half dose).

<sup>b</sup> Difference in seroconversion rate: seroconversion rate for the full dose of IIV4 minus the seroconversion rate for the half dose of IIV4.
