# Supplementary material for: Safety and Immunogenicity of a Full-dose, Split-virion, Inactivated, Quadrivalent Influenza Vaccine in Healthy Children 6-35 Months of Age: A Randomized Controlled Clinical Trial
Source: PubMed Central journal article supplement — Pediatr Infect Dis J. 2018 Nov 2;38(3):323–8. doi: 10.1097/INF.0000000000002227 (PMC6437098; doi:10.1097/inf.0000000000002227), 2018-11-02
Supplement: inf-38-323-s005.pdf [file inf-38-323-s005.pdf]

**Table S5. Post-vaccination immunogenicity for participants receiving 1 dose of IIV4**

| Measure                                   | Strain     | Half dose of IIV4 |                  | Full dose of IIV4 |                  | Comparison (95% CI)            |
|-------------------------------------------|------------|-------------------|------------------|-------------------|------------------|--------------------------------|
|                                           |            | N                 | Value (95% CI)   | N                 | Value (95% CI)   |                                |
| HAI GMT                                   | A(H1N1)    | 250               | 315 (264–377)    | 267               | 387 (326–459)    | 1.23 (0.959–1.57) <sup>a</sup> |
|                                           | A(H3N2)    | 252               | 235 (189–290)    | 268               | 343 (279–422)    | 1.46 (1.09–1.97) <sup>a</sup>  |
|                                           | B/Victoria | 250               | 389 (326–464)    | 267               | 523 (445–616)    | 1.35 (1.06–1.71) <sup>a</sup>  |
|                                           | B/Yamagata | 251               | 360 (305–425)    | 269               | 513 (435–606)    | 1.42 (1.13–1.80) <sup>a</sup>  |
| Seroconversion<br>rate (%)                | A(H1N1)    | 228               | 81.1 (75.4–86.0) | 245               | 82.0 (76.7–86.6) | 0.9 (–6.07–7.94) <sup>b</sup>  |
|                                           | A(H3N2)    | 230               | 78.7 (72.8–83.8) | 246               | 80.1 (74.5–84.9) | 1.4 (–5.87–8.69) <sup>b</sup>  |
|                                           | B/Victoria | 228               | 89.5 (84.7–93.1) | 245               | 92.7 (88.6–95.6) | 3.2 (–2.01–8.54) <sup>b</sup>  |
|                                           | B/Yamagata | 229               | 91.7 (87.3–94.9) | 247               | 93.9 (90.2–96.6) | 2.2 (–2.49–7.13) <sup>b</sup>  |
| Post- to pre-<br>vaccination GMT<br>ratio | A(H1N1)    | 228               | 10.1 (8.62–11.9) | 245               | 12.4 (10.4–14.7) | -                              |
|                                           | A(H3N2)    | 230               | 11.3 (9.37–13.7) | 246               | 12.8 (10.5–15.5) | -                              |

| Measure | Strain     | Half dose of IIV4 |                  | Full dose of IIV4 |                  | Comparison (95% CI) |
|---------|------------|-------------------|------------------|-------------------|------------------|---------------------|
|         |            | N                 | Value (95% CI)   | N                 | Value (95% CI)   |                     |
|         | B/Victoria | 228               | 11.8 (10.2–13.6) | 245               | 17.4 (15.1–20.1) | -                   |
|         | B/Yamagata | 229               | 13.2 (11.5–15.1) | 247               | 19.4 (16.9–22.2) | -                   |

Immunogenicity was assessed according to the vaccine received in all participants in the immunogenicity subset who received at least one dose of the study vaccine, had a valid post-vaccination serology result for at least one strain, and completed the study according to protocol. Abbreviations: CI, confidence interval; GMT, geometric mean titer; HAI, hemagglutination inhibition; IIV4, quadrivalent split-virion inactivated influenza vaccine; -, not calculated/determined.

<sup>a</sup> Ratio of HAI GMTs (full dose/half dose).

<sup>b</sup> Difference in seroconversion rate: seroconversion rate for the full dose of IIV4 minus the seroconversion rate for the half dose of IIV4.
