# Supplementary material for: Safety and Immunogenicity of a Full-dose, Split-virion, Inactivated, Quadrivalent Influenza Vaccine in Healthy Children 6-35 Months of Age: A Randomized Controlled Clinical Trial
Source: PubMed Central journal article supplement — Pediatr Infect Dis J. 2018 Nov 2;38(3):323–8. doi: 10.1097/INF.0000000000002227 (PMC6437098; doi:10.1097/inf.0000000000002227), 2018-11-02
Supplement: inf-38-323-s006.pdf [file inf-38-323-s006.pdf]

**Table S6. Post-vaccination immunogenicity for participants receiving 2 doses of IIV4**

| Measure                                   | Strain     | Half dose of IIV4 |                  | Full dose of IIV4 |                  | Comparison (95% CI)            |
|-------------------------------------------|------------|-------------------|------------------|-------------------|------------------|--------------------------------|
|                                           |            | N                 | Value (95% CI)   | N                 | Value (95% CI)   |                                |
| HAI GMT                                   | A(H1N1)    | 270               | 149 (120–185)    | 272               | 249 (203–306)    | 1.67 (1.24–2.26) <sup>a</sup>  |
|                                           | A(H3N2)    | 273               | 209 (170–258)    | 274               | 321 (269–383)    | 1.53 (1.17–2.01) <sup>a</sup>  |
|                                           | B/Victoria | 270               | 180 (147–221)    | 272               | 233 (190–286)    | 1.29 (0.971–1.72) <sup>a</sup> |
|                                           | B/Yamagata | 273               | 169 (140–204)    | 274               | 239 (198–288)    | 1.41 (1.08–1.84) <sup>a</sup>  |
| Seroconversion<br>rate (%)                | A(H1N1)    | 242               | 76.9 (71.0–82.0) | 238               | 86.1 (81.1–90.3) | 9.3 (2.32–16.1) <sup>b</sup>   |
|                                           | A(H3N2)    | 245               | 84.9 (79.8–89.1) | 241               | 92.5 (88.5–95.5) | 7.6 (2.00–13.3) <sup>b</sup>   |
|                                           | B/Victoria | 242               | 85.1 (80.0–89.4) | 238               | 84.5 (79.2–88.8) | –0.7 (–7.15–5.79) <sup>b</sup> |
|                                           | B/Yamagata | 245               | 84.1 (78.9–88.4) | 241               | 88.4 (83.6–92.1) | 4.3 (–1.87–10.5) <sup>b</sup>  |
| Post- to pre-<br>vaccination GMT<br>ratio | A(H1N1)    | 242               | 8.05 (6.74–9.61) | 238               | 16.4 (13.5–19.9) | -                              |
|                                           | A(H3N2)    | 245               | 12.2 (10.2–14.6) | 241               | 21.1 (17.8–25.1) | -                              |

| Measure | Strain     | Half dose of IIV4 |                  | Full dose of IIV4 |                  | Comparison (95% CI) |
|---------|------------|-------------------|------------------|-------------------|------------------|---------------------|
|         |            | N                 | Value (95% CI)   | N                 | Value (95% CI)   |                     |
|         | B/Victoria | 242               | 12.9 (10.8–15.4) | 238               | 17.0 (14.0–20.7) | -                   |
|         | B/Yamagata | 245               | 12.2 (10.3–14.5) | 241               | 18.8 (15.5–22.8) | -                   |

Immunogenicity was assessed according to the vaccine received in all participants in the immunogenicity subset who received at least one dose of the study vaccine, had a valid post-vaccination serology result for at least one strain, and completed the study according to protocol. Abbreviations: CI, confidence interval; GMT, geometric mean titer; HAI, hemagglutination inhibition; IIV4, quadrivalent split-virion inactivated influenza vaccine; -, not calculated/determined.

<sup>a</sup> Ratio of HAI GMTs (full dose/half dose).

<sup>b</sup> Difference in seroconversion rate: seroconversion rate for the full dose of IIV4 minus the seroconversion rate for the half dose of IIV4.
