# Supplementary material for: Safety and Immunogenicity of a Full-dose, Split-virion, Inactivated, Quadrivalent Influenza Vaccine in Healthy Children 6-35 Months of Age: A Randomized Controlled Clinical Trial
Source: PubMed Central journal article supplement — Pediatr Infect Dis J. 2018 Nov 2;38(3):323–8. doi: 10.1097/INF.0000000000002227 (PMC6437098; doi:10.1097/inf.0000000000002227), 2018-11-02
Supplement: inf-38-323-s007.pdf [file inf-38-323-s007.pdf]

**Table S7. Grade 3 solicited reactions within 7 days**

| <b>Grade 3 solicited reaction</b> | <b>Half dose of IIV4</b> |                   | <b>Full dose of IIV4</b> |                   |
|-----------------------------------|--------------------------|-------------------|--------------------------|-------------------|
|                                   | <b>n/N</b>               | <b>% (95% CI)</b> | <b>n/N</b>               | <b>% (95% CI)</b> |
| Any                               | 67/909                   | 7.4 (5.8, 9.3)    | 79/941                   | 8.4 (6.7, 10.4)   |
| Injection site                    |                          |                   |                          |                   |
| Tenderness                        | 16/909                   | 1.8 (1.0, 2.8)    | 13/939                   | 1.4 (0.7, 2.4)    |
| Tenderness                        | 15/909                   | 1.7 (0.9, 2.7)    | 11/939                   | 1.2 (0.6, 2.1)    |
| Redness                           | 0/909                    | 0.0 (0.0, 0.4)    | 2/938                    | 0.2 (0.0, 0.8)    |
| Swelling                          | 1/908                    | 0.1 (0.0, 0.6)    | 0/937                    | 0.0 (0.0, 0.4)    |
| Systemic                          |                          |                   |                          |                   |
| Fever                             | 58/909                   | 6.4 (4.9, 8.2)    | 67/941                   | 7.1 (5.6, 9.0)    |
| Fever                             | 5/893                    | 0.6 (0.2, 1.3)    | 11/930                   | 1.2 (0.6, 2.1)    |
| Vomiting                          | 4/908                    | 0.4 (0.1, 1.1)    | 5/941                    | 0.5 (0.2, 1.2)    |
| Abnormal crying                   | 28/908                   | 3.1 (2.1, 4.4)    | 24/941                   | 2.6 (1.6, 3.8)    |
| Drowsiness                        | 19/908                   | 2.1 (1.3, 3.2)    | 15/940                   | 1.6 (0.9, 2.6)    |
| Loss of appetite                  | 13/908                   | 1.4 (0.8, 2.4)    | 21/940                   | 2.2 (1.4, 3.4)    |
| Irritability                      | 33/908                   | 3.6 (2.5, 5.1)    | 38/940                   | 4.0 (2.9, 5.5)    |

Safety was assessed in all vaccinated participants according to the vaccine they actually received.

Abbreviations: AE, adverse event; SAE, serious adverse event.
