# Supplementary material for: Safety and Immunogenicity of a Full-dose, Split-virion, Inactivated, Quadrivalent Influenza Vaccine in Healthy Children 6-35 Months of Age: A Randomized Controlled Clinical Trial
Source: PubMed Central journal article supplement — Pediatr Infect Dis J. 2018 Nov 2;38(3):323–8. doi: 10.1097/INF.0000000000002227 (PMC6437098; doi:10.1097/inf.0000000000002227), 2018-11-02
Supplement: inf-38-323-s008.pdf [file inf-38-323-s008.pdf]

**Table S8. Reactogenicity of IIV4 by age**

| <b>6–23 months</b>               |                          |                   |                          |                   |
|----------------------------------|--------------------------|-------------------|--------------------------|-------------------|
| <b>Event</b>                     | <b>Half dose of IIV4</b> |                   | <b>Full dose of IIV4</b> |                   |
|                                  | <b>n/N</b>               | <b>% (95% CI)</b> | <b>n/N</b>               | <b>% (95% CI)</b> |
| Solicited reaction within 7 days | 355/509                  | 69.7 (65.5–73.7)  | 404/533                  | 75.8 (71.9–79.4)  |
| Injection site                   |                          |                   |                          |                   |
| Tenderness                       | 250/509                  | 49.1 (44.7–53.6)  | 287/531                  | 54.0 (49.7–58.3)  |
| Redness                          | 227/509                  | 44.6 (40.2–49.0)  | 255/531                  | 48.0 (43.7–52.4)  |
| Swelling                         | 99/509                   | 19.4 (16.1–23.2)  | 113/530                  | 21.3 (17.9–25.1)  |
| Systemic                         |                          |                   |                          |                   |
| Fever                            | 54/508                   | 10.6 (8.1–13.6)   | 73/530                   | 13.8 (11.0–17.0)  |
| Vomiting                         | 305/509                  | 59.9 (55.5–64.2)  | 347/533                  | 65.1 (60.9–69.2)  |
| Abnormal Crying                  | 60/498                   | 12.0 (9.3–15.2)   | 83/530                   | 15.7 (12.7–19.0)  |
| Drowsiness                       | 60/509                   | 11.8 (9.1–14.9)   | 73/533                   | 13.7 (10.9–16.9)  |
| Loss of appetite                 | 195/509                  | 38.3 (34.1–42.7)  | 209/533                  | 39.2 (35.0–43.5)  |
| Irritability                     | 172/509                  | 33.8 (29.7–38.1)  | 188/532                  | 35.3 (31.3–39.6)  |
|                                  | 139/509                  | 27.3 (23.5–31.4)  | 163/532                  | 30.6 (26.7–34.8)  |
|                                  | 248/509                  | 48.7 (44.3–53.2)  | 287/532                  | 53.9 (49.6–58.2)  |

| <b>24–35 months</b>              |                          |                   |                          |                   |
|----------------------------------|--------------------------|-------------------|--------------------------|-------------------|
| <b>Event</b>                     | <b>Half dose of IIV4</b> |                   | <b>Full dose of IIV4</b> |                   |
|                                  | <b>n/N</b>               | <b>% (95% CI)</b> | <b>n/N</b>               | <b>% (95% CI)</b> |
| Solicited reaction within 7 days | 290/400                  | 72.5 (67.8–76.8)  | 293/407                  | 72.0 (67.4–76.3)  |
| Injection site                   | 230/400                  | 57.5 (52.5–62.4)  | 245/407                  | 60.2 (55.3–65.0)  |
| Tenderness                       | 203/400                  | 50.8 (45.7–55.8)  | 217/407                  | 53.3 (48.3–58.2)  |
| Redness                          | 111/400                  | 27.8 (23.4–32.4)  | 114/407                  | 28.0 (23.7–32.6)  |
| Swelling                         | 63/400                   | 15.8 (12.3–19.7)  | 64/406                   | 15.8 (12.4–19.7)  |
| Systemic                         | 228/400                  | 57.0 (52.0–61.9)  | 213/407                  | 52.3 (47.4–57.3)  |
| Fever                            | 41/395                   | 10.4 (7.6–13.8)   | 30/399                   | 7.5 (5.1–10.6)    |
| Vomiting                         | 31/399                   | 7.8 (5.3–10.8)    | 23/407                   | 5.7 (3.6–8.4)     |
| Abnormal Crying                  | 107/399                  | 26.8 (22.5–31.5)  | 111/407                  | 27.3 (23.0–31.9)  |
| Drowsiness                       | 118/399                  | 29.6 (25.1–34.3)  | 106/407                  | 26.0 (21.8–30.6)  |
| Loss of appetite                 | 109/399                  | 27.3 (23.0–32.0)  | 103/407                  | 25.3 (21.2–29.8)  |
| Irritability                     | 182/399                  | 45.6 (40.6–50.6)  | 169/407                  | 41.5 (36.7–46.5)  |

Safety was assessed in all vaccinated participants according to the vaccine received. Abbreviations: CI, confidence interval; IIV4, quadrivalent split-virion inactivated influenza vaccine.
